# Supplementary material for: Anti-injury Mechanisms in the Liver and its Molecular Regulatory Networks of the Hezuo Pig under Cold Stress
Source: Research Square preprint supplement (doi:10.21203/rs.3.rs-7481559/v1), 2025-09-09
Supplement: Supplementary file 1 [file 6c8890b9eb8ae5c06d1d1c6c.docx]

**Supplementary material**

**Research article title:** Anti-injury mechanisms in the liver and its molecular regulatory networks of the Hezuo pig under cold stress

**Authors:** Jihong Yana, Yuran Tanga, Shuangbao Guna,b,c, * and Pengfei Wanga,*

**Journal name:** *Porcine Health Management*

| Table S1 Primers of RNAs used for the RT-qPCR | | | |
| --- | --- | --- | --- |
| RNA | Forward primer sequence (5′→ 3′) | Reverse primer sequence (5′→ 3′) | Product length |
| NAGS | CCTGTTCAAGAACGCCGAAC | GTTCACTAAGCGGTCCTGGT | 73 |
| PIK3C2G | GTGCCTGATGCTGTAACCCT | CACCAGCCAGCACAGGAATA | 161 |
| DDX58 | CTGGAGCAACGTCTGACACT | TGCTGTTTGCTGGTGTTGTG | 169 |
| CYP2A19 | AGTGGTGCTGTGTGGATACG | AGCCTTTGAAGAGCCAGTCG | 107 |
| MBL1 | AGCTGGCAAACTTAGAGGGAC | AGCTCAGCACACAGAGTCTTC | 163 |
| BBOX1 | ACTGGCGGTTACTTCACGG | CCACATCCCAGTCGGCATAA | 90 |
| MSTRG.7463.1 | ACACACATGGAGACAGATGTAGG | GAAATGCTCTGGCTGTGAGC | 121 |
| MSTRG.15052.4 | GAGCTTAACTACCATGCCGC | TTAAGGGGAAAGAGTGGGCG | 165 |
| MSTRG.6794.1 | CCCAGAACCCTCAAACGACA | TTGGCTCAACCTTCCAGAGC | 160 |
| novel_circ_023716 | GGCCTGATTTGCAGAGTCATC | TGTATCTTCCTCAGGGCCGTA | 164 |
| novel_circ_000082 | TCATGAATACAAGGCCTTCAGC | TGGTGTTTCCCTTTGGGGAT | 114 |
| novel_circ_008930 | ACTTAGGCTGGGTTGTCGGA | AGGGAACCGTCTCCTTGTCA | 242 |
| ssc-miR-29b | CGCCTAGCACCATTTGAAATCAGTGTT |  |  |
| ssc-miR-9843-3p | CCGTCTGTGAACTAGAAACCTCTGG |  |  |
| ssc-miR-129b | CTTTTTGCGGTCTGGGCTTGC |  |  |
| GAPDH | AGTATGATTCCACCCACGGC | TACGTAGCACCAGCATCACC | 139 |
| U6 | GGAACGATACAGAGAAGATTAGC | TGGAACGCTTCACGAATTTGCG |  |

| Table S2 Data Filtering Summary Table | | | | | | | | |
| --- | --- | --- | --- | --- | --- | --- | --- | --- |
| Sample | Raw Datas | Clean Data(%) | Adapter(%) | Low Quality(%) | Clean Data(bp) | Q20 | Q30 | GC(%) |
| BC 1 | 107221488 | 106972238 (99.77%) | 38632 (0.04%) | 210480 (0.20%) | 15970464996 | 15429873225 (96.62%) | 14524596571 (90.95%) | 8683760795 (54.37%) |
| BC 2 | 102314212 | 102075736 (99.77%) | 35002 (0.03%) | 203376 (0.20%) | 15240953489 | 14728808939 (96.64%) | 13870101976 (91.01%) | 8070656500 (52.95%) |
| BC 3 | 103369014 | 103106552 (99.75%) | 45214 (0.04%) | 217130 (0.21%) | 15377515428 | 14899489184 (96.89%) | 14081999990 (91.58%) | 8409334081 (54.69%) |
| BT 1 | 75655162 | 75466316 (99.75%) | 24938 (0.03%) | 163854 (0.22%) | 11270685221 | 10876386832 (96.50%) | 10235114245 (90.81%) | 6083656767 (53.98%) |
| BT 2 | 91253228 | 91032280 (99.76%) | 35416 (0.04%) | 185410 (0.20%) | 13596697862 | 13156964641 (96.77%) | 12414904273 (91.31%) | 7301040345 (53.70%) |
| BT 3 | 103786430 | 103484336 (99.71%) | 46628 (0.04%) | 255360 (0.25%) | 15452720953 | 14858769346 (96.16%) | 13915821345 (90.05%) | 8505780315 (55.04%) |
| HC 1 | 92348050 | 92110544 (99.74%) | 37254 (0.04%) | 200134 (0.22%) | 13755143136 | 13235135629 (96.22%) | 12391095644 (90.08%) | 7502322645 (54.54%) |
| HC 2 | 85620090 | 85330644 (99.66%) | 38852 (0.05%) | 250502 (0.29%) | 12743306834 | 12288477460 (96.43%) | 11540957444 (90.56%) | 6933775579 (54.41%) |
| HC 3 | 79153206 | 78956454 (99.75%) | 32404 (0.04%) | 164296 (0.21%) | 11785510042 | 11365513491 (96.44%) | 10684394479 (90.66%) | 6331881510 (53.73%) |
| HT 1 | 78386404 | 78187266 (99.75%) | 32010 (0.04%) | 167074 (0.21%) | 11666915796 | 11267539190 (96.58%) | 10610157030 (90.94%) | 6377079646 (54.66%) |
| HT 2 | 85966444 | 85659734 (99.64%) | 42836 (0.05%) | 263766 (0.31%) | 12782138481 | 12333849951 (96.49%) | 11604482396 (90.79%) | 7016316612 (54.89%) |
| HT 3 | 91475350 | 91239066 (99.74%) | 36568 (0.04%) | 199658 (0.22%) | 13615584718 | 13140543623 (96.51%) | 12361579707 (90.79%) | 7325079843 (53.80%) |

| Table S3 Statistical of ribosome alignment | | | |
| --- | --- | --- | --- |
| Sample | Clean reads | Mapped reads | Unmapped reads |
| BC 1 | 106972238 | 312476 (0.29%) | 106659762 (99.71%) |
| BC 2 | 102075736 | 352070 (0.34%) | 101723666 (99.66%) |
| BC 3 | 103106552 | 305280 (0.30%) | 102801272 (99.70%) |
| BT 1 | 75466316 | 138366 (0.18%) | 75327950 (99.82%) |
| BT 2 | 91032280 | 185980 (0.20%) | 90846300 (99.80%) |
| BT 3 | 103484336 | 314778 (0.30%) | 103169558 (99.70%) |
| HC 1 | 92110544 | 124570 (0.14%) | 91985974 (99.86%) |
| HC 2 | 85330644 | 550638 (0.65%) | 84780006 (99.35%) |
| HC 3 | 78956454 | 206020 (0.26%) | 78750434 (99.74%) |
| HT 1 | 78187266 | 408438 (0.52%) | 77778828 (99.48%) |
| HT 2 | 85659734 | 580890 (0.68%) | 85078844 (99.32%) |
| HT 3 | 91239066 | 264266 (0.29%) | 90974800 (99.71%) |

| Table S4 Alignment of pig reference genome statistics | | | | | |
| --- | --- | --- | --- | --- | --- |
| Sample | Total | Unmapped | Unique mapped | Multiple mapped | Tatal mapped |
| BC 1 | 106659762 | 19740609 (18.51%) | 82368499 (77.23%) | 4550654 (4.27%) | 86919153 (81.49%) |
| BC 2 | 101723666 | 17039095 (16.75%) | 81176506 (79.80%) | 3508065 (3.45%) | 84684571 (83.25%) |
| BC 3 | 102801272 | 19099453 (18.58%) | 78889046 (76.74%) | 4812773 (4.68%) | 83701819 (81.42%) |
| BT 1 | 75327950 | 13816826 (18.34%) | 58559288 (77.74%) | 2951836 (3.92%) | 61511124 (81.66%) |
| BT 2 | 90846300 | 15759891 (17.35%) | 71391967 (78.59%) | 3694442 (4.07%) | 75086409 (82.65%) |
| BT 3 | 103169558 | 22470749 (21.78%) | 76853659 (74.49%) | 3845150 (3.73%) | 80698809 (78.22%) |
| HC 1 | 91985974 | 17152943 (18.65%) | 70857355 (77.03%) | 3975676 (4.32%) | 74833031 (81.35%) |
| HC 2 | 84780006 | 15421785 (18.19%) | 65545918 (77.31%) | 3812303 (4.50%) | 69358221 (81.81%) |
| HC 3 | 78750434 | 13927249 (17.69%) | 60991412 (77.45%) | 3831773 (4.87%) | 64823185 (82.31%) |
| HT 1 | 77778828 | 14053980 (18.07%) | 60025724 (77.17%) | 3699124 (4.76%) | 63724848 (81.93%) |
| HT 2 | 85078844 | 16782095 (19.73%) | 65354815 (76.82%) | 2941934 (3.46%) | 68296749 (80.27%) |
| HT 3 | 90974800 | 15381792 (16.91%) | 71611148 (78.72%) | 3981860 (4.38%) | 75593008 (83.09%) |

| Table S5 Statistical results of miRNA sequencing data | | | | | | | |
| --- | --- | --- | --- | --- | --- | --- | --- |
| Sample | Clean reads | High quality | 3’ adapter null | Insert null | 5’ adapter contaminants | Poly A | Clean tags |
| BC 1 | 9432571 (100%) | 9240471 (97.9634%) | 82970 (0.8979%) | 229656 (2.4853%) | 6288 (0.0680%) | 322 (0.0035%) | 8791581 (93.2045%) |
| BC 2 | 10149003 (100%) | 9977467 (98.3098%) | 87281 (0.8748%) | 255918 (2.5650%) | 6845 (0.0686%) | 343 (0.0034%) | 9481083 (93.4189%) |
| BC 3 | 9262093 (100%) | 9097008 (98.2176%) | 64500 (0.7090%) | 91131 (1.0018%) | 5450 (0.0599%) | 191 (0.0021%) | 8851245 (95.5642%) |
| BT 1 | 12449806 (100%) | 12226399 (98.2055%) | 103533 (0.8468%) | 93017 (0.7608%) | 5754 (0.0471%) | 209 (0.0017%) | 11896665 (95.5570%) |
| BT 2 | 9146755 (100%) | 8967750 (98.0430%) | 79064 (0.8816%) | 206501 (2.3027%) | 5843 (0.0652%) | 341 (0.0038%) | 8578078 (93.7827%) |
| BT 3 | 9870419 (100%) | 9691090 (98.1832%) | 82129 (0.8475%) | 208041 (2.1467%) | 6434 (0.0664%) | 294 (0.0030%) | 9267946 (93.8962%) |
| HC 1 | 10406298 (100%) | 10207866 (98.0932%) | 66236 (0.6489%) | 62256 (0.6099%) | 3968 (0.0389%) | 159 (0.0016%) | 10002486 (96.1195%) |
| HC 2 | 12957339 (100%) | 12715207 (98.1313%) | 110025 (0.8653%) | 80836 (0.6357%) | 4768 (0.0375%) | 164 (0.0013%) | 12465498 (96.2042%) |
| HC 3 | 11413938 (100%) | 11206034 (98.1785%) | 112798 (1.0066%) | 82454 (0.7358%) | 4526 (0.0404%) | 148 (0.0013%) | 10917398 (95.6497%) |
| HT 1 | 9922024 (100%) | 9739001 (98.1554%) | 89626 (0.9203%) | 66237 (0.6801%) | 3485 (0.0358%) | 138 (0.0014%) | 9532598 (96.0751%) |
| HT 2 | 10214249 (100%) | 10012877 (98.0285%) | 98746 (0.9862%) | 71336 (0.7124%) | 3565 (0.0356%) | 161 (0.0016%) | 9788235 (95.8292%) |
| HT 3 | 9154038 (100%) | 8994755 (98.2600%) | 96222 (1.0698%) | 51018 (0.5672%) | 3204 (0.0356%) | 110 (0.0012%) | 8774018 (95.8486%) |

| Table S6 Statistics of miRNA sequence alignment results | | | | | | | |
| --- | --- | --- | --- | --- | --- | --- | --- |
| Sample | Total tags | rRNA | scRNA | snRNA | snoRNA | tRNA | Mapped tags |
| BC 1 | 8791581 | 49761 (0.57%) | 74 (0.00%) | 1821 (0.02%) | 14552 (0.17%) | 16122 (0.18%) | 7008382 (79.72%) |
| BC 2 | 9481083 | 73666 (0.78%) | 118 (0.00%) | 1875 (0.02%) | 17998 (0.19%) | 39630 (0.42%) | 7183491 (75.77%) |
| BC 3 | 8851245 | 60226 (0.68%) | 84 (0.00%) | 1955 (0.02%) | 13824 (0.16%) | 19119 (0.22%) | 7033449 (79.46%) |
| BT 1 | 11896665 | 82373 (0.69%) | 116 (0.00%) | 2337 (0.02%) | 27166 (0.23%) | 73254 (0.62%) | 9623139 (80.89%) |
| BT 2 | 8578078 | 66529 (0.78%) | 85 (0.00%) | 1759 (0.02%) | 18098 (0.21%) | 45494 (0.53%) | 6909672 (80.55%) |
| BT 3 | 9267946 | 66106 (0.71%) | 65 (0.00%) | 1871 (0.02%) | 22131 (0.24%) | 27326 (0.29%) | 7455561 (80.44%) |
| HC 1 | 10002486 | 76900 (0.77%) | 75 (0.00%) | 1967 (0.02%) | 23670 (0.24%) | 23557 (0.24%) | 7829918 (78.28%) |
| HC 2 | 12465498 | 89458 (0.72%) | 89 (0.00%) | 2201 (0.02%) | 24427 (0.20%) | 32518 (0.26%) | 9758651 (78.29%) |
| HC 3 | 10917398 | 75363 (0.69%) | 99 (0.00%) | 2178 (0.02%) | 23736 (0.22%) | 28375 (0.26%) | 8611663 (78.88%) |
| HT 1 | 9532598 | 84164 (0.88%) | 58 (0.00%) | 1978 (0.02%) | 26135 (0.27%) | 47374 (0.50%) | 7535830 (79.05%) |
| HT 2 | 9788235 | 80574 (0.82%) | 32 (0.00%) | 1864 (0.02%) | 19646 (0.20%) | 42081 (0.43%) | 7764946 (79.33%) |
| HT 3 | 8774018 | 75598 (0.86%) | 66 (0.00%) | 1653 (0.02%) | 21117 (0.24%) | 43468 (0.50%) | 6870444 (78.30%) |
